# Supplementary material for: H3K4me3 regulates RNA polymerase II promoter-proximal pause-release
Source: Springer Nature journal article supplement (doi:10.1038/s41586-023-05780-8), 2023-03-01
Supplement: MOESM1 [file 41586_2023_5780_MOESM1_ESM.pdf]

---

**Supplementary information**

---

**H3K4me3 regulates RNA polymerase II promoter-proximal pause-release**

---

In the format provided by the  
authors and unedited

---

**Supplementary information**

---

# **H3K4me3 regulates RNA polymerase II promoter-proximal pause-release**

---

In the format provided by the  
authors and unedited

Supplementary Information

a

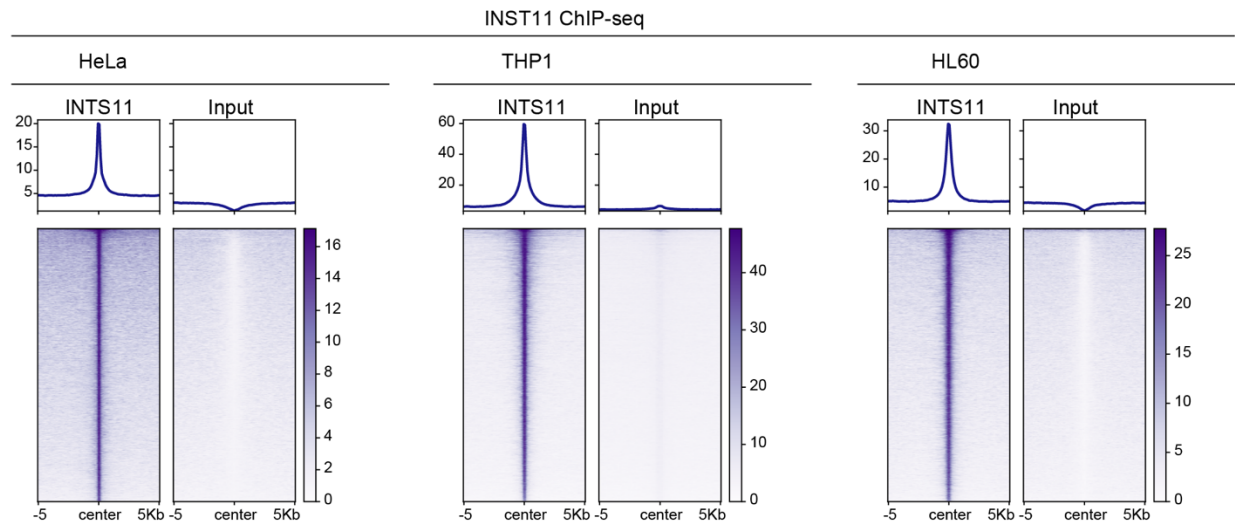

b

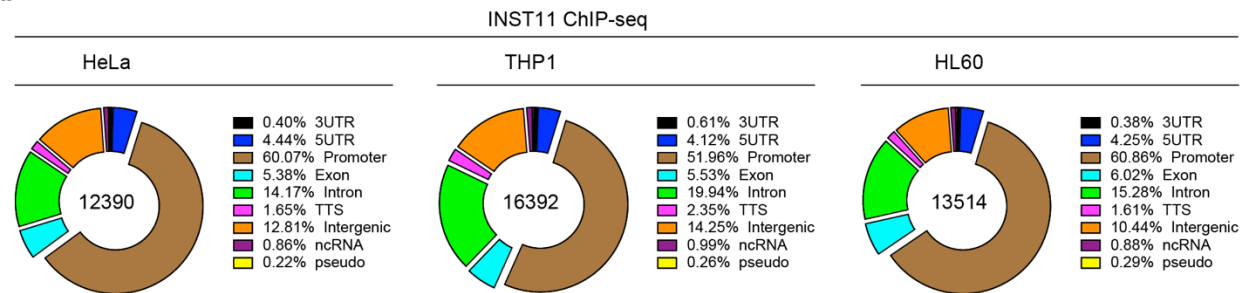

**Supplementary Fig.1. INTS11 occupancy at genome wide.**

(a) INTS11 genomic binding sites as defined as enrichment over input by ChIP-seq.

(b) The genomic binding sites of INTS11 were predominantly localized to promoter region of genes.

The INTS11 ChIP-seq data for HeLa, THP1 and HL60 were obtained from published papers.

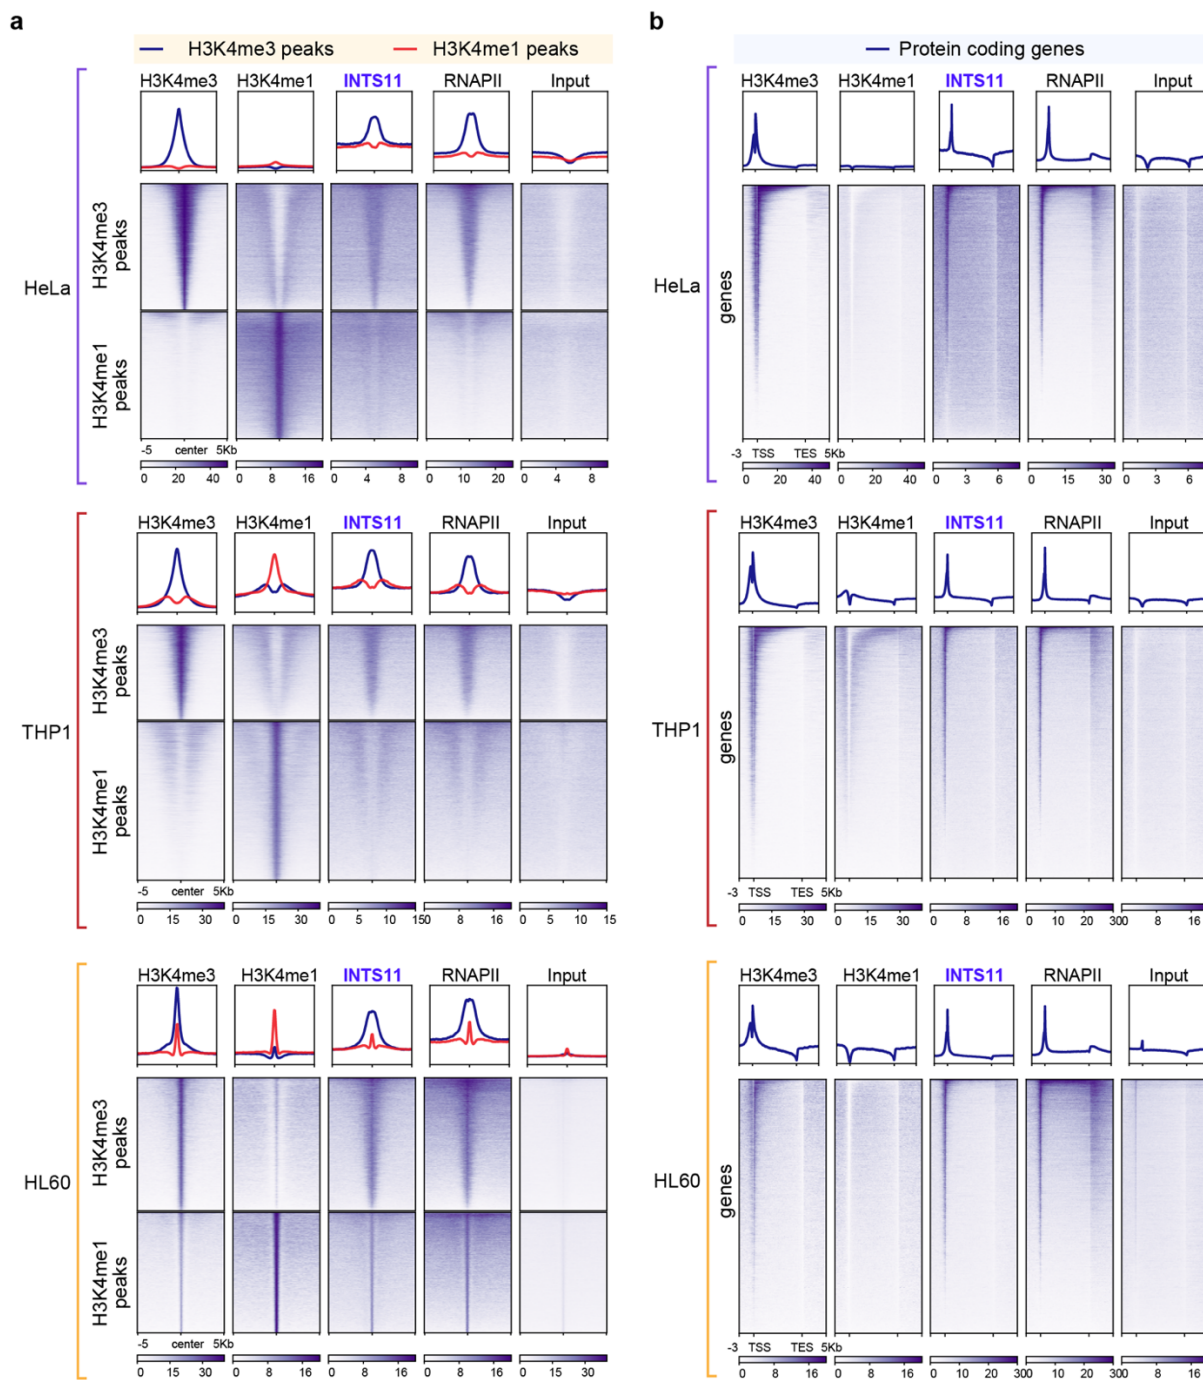

**Supplementary Fig.2. INTS11 is enriched at H3K4me3-positive chromatin and binds promoter-proximal region of protein-coding genes.**

**(a)** ChIP-seq heatmaps and profiles at H3K4me3 or H3K4me1 peak center in the depicted cell lines.

Enrichments were plotted over the enrichment peak center (peak center  $\pm$  5 kb).

**(b)** Genome-wide binding averages of ChIP-seq signal on protein-coding genes in different cell lines.

The genomic binding sites of INTS11 were predominantly localized to the promoter region of genes.

Data are displayed from 3 kb upstream of the transcriptional start site to 5 kb downstream of the end of each gene. TSS, transcription start site, TES, transcription end site. Rows of heatmap are sorted by decreasing H3K4me3 occupancy. The INTS11 ChIP-seq data for HeLa, THP1 and HL60 were obtained from published papers.

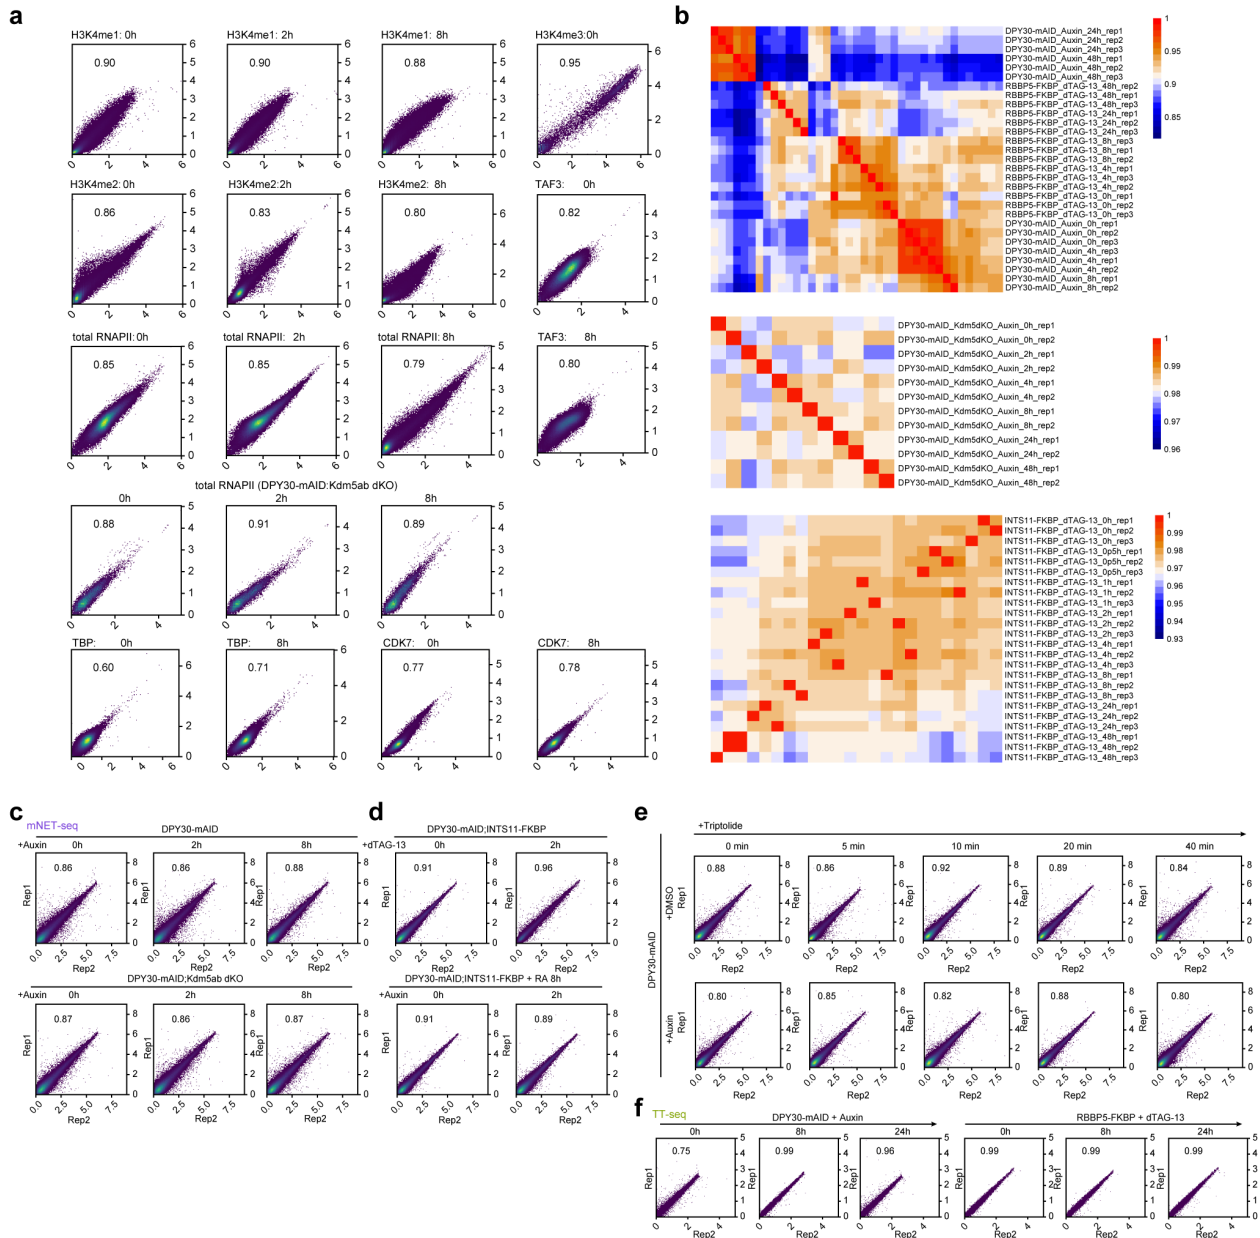

**Supplementary Fig.3. Reproducibility of key sequencing data in this study.**

(a) Correlations between ChIP-seq experiments. Normalized reads per 100 kb bins for DPY30-mAID ( $y$  axis) and RBBP5-FKBP ( $x$  axis) degreen cells in the indicated samples and time points were plotted. Spearman correlation coefficients are indicated in the panels.

(b) Correlations between SLAM-seq experiments. Spearman correlation coefficients are indicated in the panels.

(c-e) Correlations between replicates of mNET-seq experiments.

(f) Correlations between replicates of TTchem-seq and DRB/TTchem-seq experiments. Normalized reads per 100 kb bins for repeat 1 ( $y$  axis) and repeat 2 ( $x$  axis) in the indicated samples and time points were plotted. Spearman correlation coefficients are indicated in the panels.

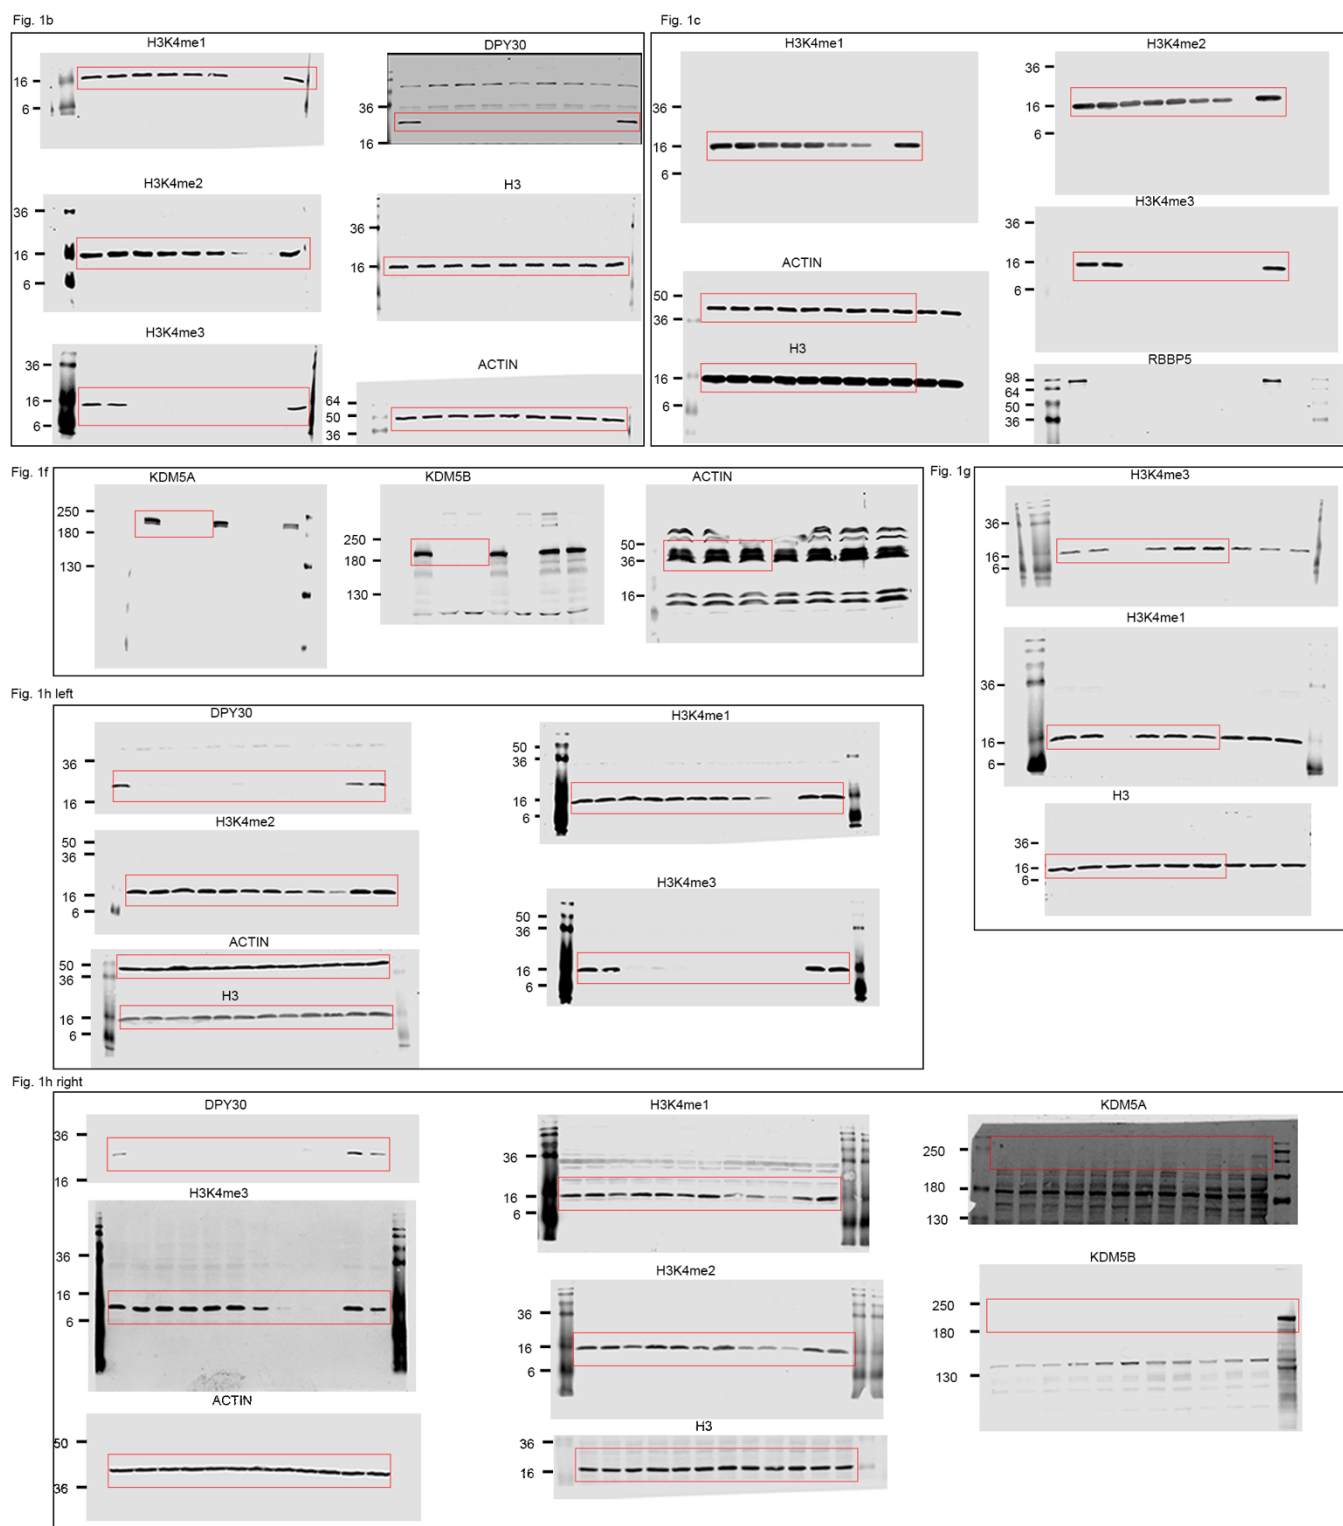

**Supplementary Fig.4. Source Data of unprocessed western blots.**

**Supplementary Fig.4. Source Data of unprocessed western blots.**

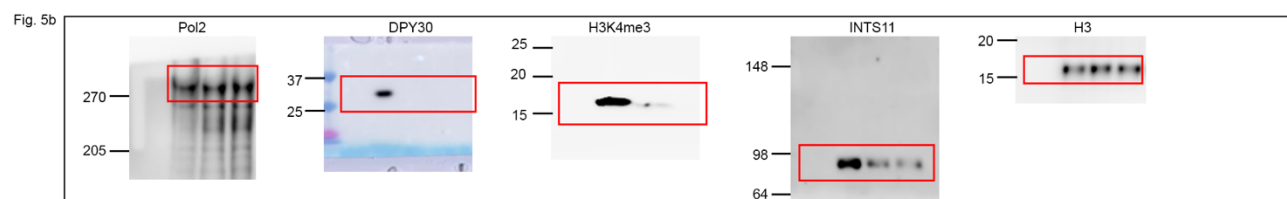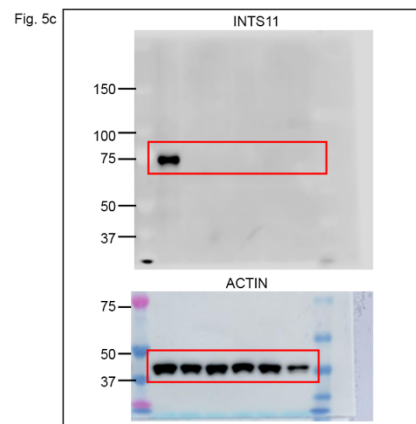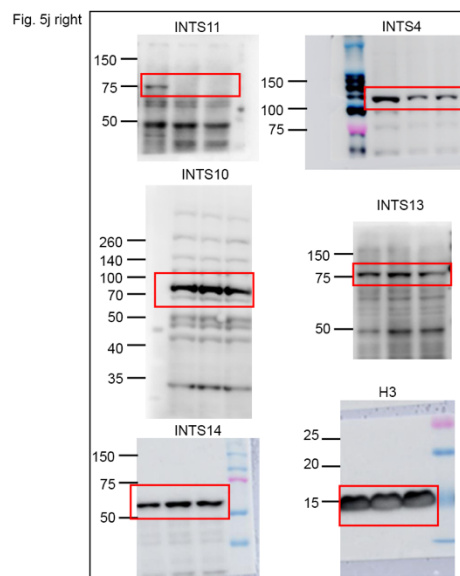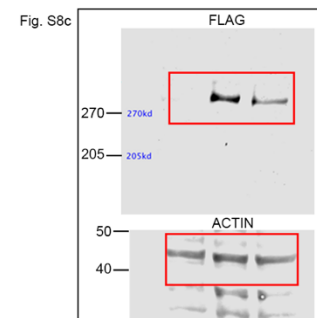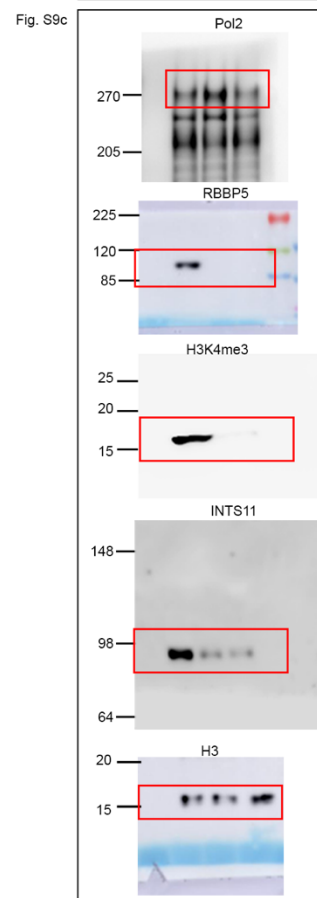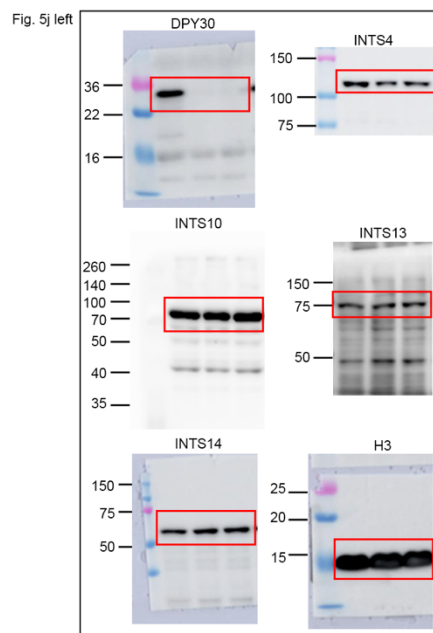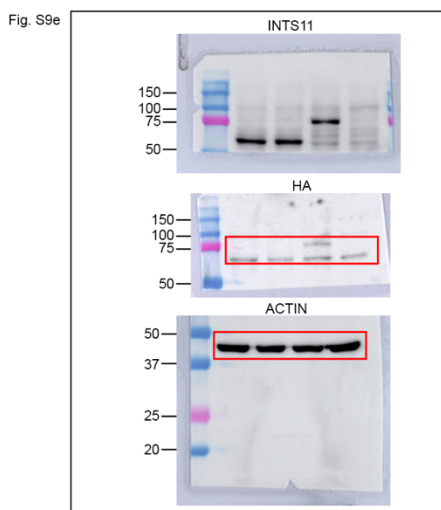

**Supplementary Fig.4. Source Data of unprocessed western blots.**

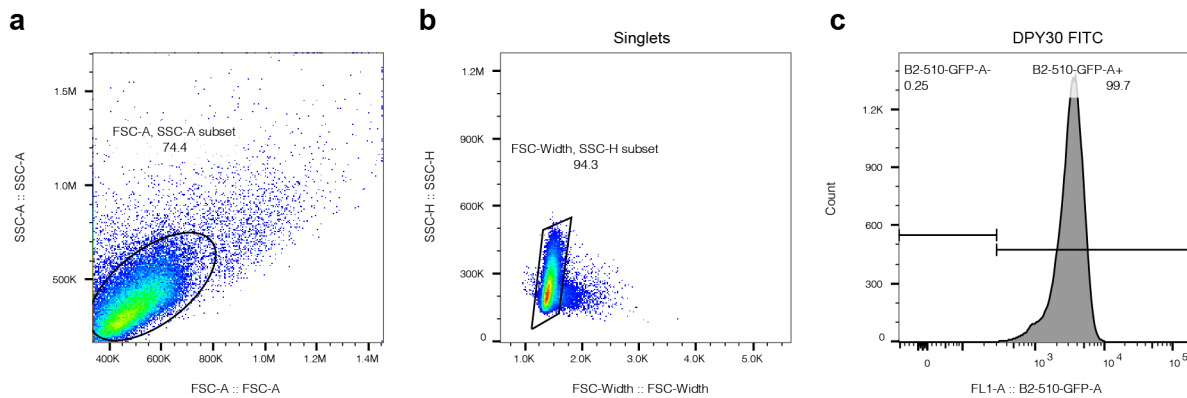

**Supplementary Fig.5. Gating strategy for flow cytometry analysis**

- (a) Representative gating for cells in E14 mESCs.
- (b) Representative gating for singlets in E14 mESCs.
- (c) Representation of DPY30-positive cells in E14 mESCs.
